# Supplementary material for: Critically appraised topic on adverse food reactions of companion animals (5): discrepancies between ingredients and labeling in commercial pet foods
Source: PubMed Central journal article supplement (PMC5778722; doi:10.1186/s12917-018-1346-y), 2018-01-22
Supplement: 12917_2018_1346_MOESM1_ESM.pdf [file 12917_2018_1346_MOESM1_ESM.pdf]

Supplementary Table 1: studies summary

| Author      | Year | Ref # | Country        | Method       | # Food tested | Tested source of allergens                                               | # (%) of diets with detected ingredient(s) not on the label | Identity of the source of allergen(s) not on the label * | # (%) of diets with ingredient(s) missing from the label | Identity of the source of allergen(s) missing from the label | Foods tested                                                                                                                                                           |
|-------------|------|-------|----------------|--------------|---------------|--------------------------------------------------------------------------|-------------------------------------------------------------|----------------------------------------------------------|----------------------------------------------------------|--------------------------------------------------------------|------------------------------------------------------------------------------------------------------------------------------------------------------------------------|
| Dalmasso    | 2004 | [11]  | Italy          | PCR          | 4             | fish, pork, poultry, ruminants                                           | 1 (25%)                                                     | poultry                                                  | 0 (0%)                                                   | -                                                            | 4 pet foods (brands not specified)                                                                                                                                     |
| Myers       | 2004 | [12]  | USA            | PCR          | 31            | beef, cat, dog, horse, lamb, pork, poultry                               | 11 (35%)                                                    | poultry > beef                                           | 2 (6%)                                                   | lamb, poultry                                                | 31 dog foods (brands not specified)                                                                                                                                    |
| Wang        | 2004 | [13]  | Taiwan         | PCR          | 16            | beef, chicken, goat, pork                                                | 10 (63%)                                                    | not clearly specified                                    | 2 (13%)                                                  | chicken                                                      | 8 cat and 8 dog foods (brands not specified)                                                                                                                           |
| Raditic     | 2011 | [8]   | USA            | ELISA        | 8             | beef, poultry, soy                                                       | 4 (50%)                                                     | soy > beef                                               | 3 (38%)                                                  | chicken                                                      | 8 dog foods: 4 "test" and 4 "control" diets; the test diets were labeled to contain venison but not beef or soy (brands mentioned)                                     |
| Pegels      | 2013 | [14]  | Spain          | PCR          | 96            | beef, chicken, fish, hare, lamb, leporids, pork, rabbit, turkey, venison | 16 (17%)                                                    | chicken                                                  | 16 (17%)                                                 | rabbit > venison                                             | 96 cat and dog foods with a rabbit protein ingredient on the label (brands not specified)                                                                              |
| Pegels      | 2013 | [15]  | Spain          | PCR          | 100           | beef, chicken, fish, pork, poultry, turkey                               | 0 (0%)                                                      | -                                                        | 4 (4%)                                                   | fish oil                                                     | 100 cat, dog and fish foods with a fish protein ingredient on the label (brands not specified)                                                                         |
| Ricci       | 2013 | [1]   | Italy          | MBFI PCR     | 12            | avian, fish, mammalian DNA (PCR) or bones (MBFI)                         | 10 (83%)                                                    | poultry > fish > mammals                                 | 0 (0%)                                                   | -                                                            | 12 dog foods used for elimination diets: 11 with "novel" protein source and 1 with hydrolyzed proteins (brands not specified)                                          |
| Pegels      | 2014 | [16]  | Spain          | PCR          | 210           | avian (multiple species)                                                 | 66/87 (76%)                                                 | avian (species not characterized)                        | 0/123 (0%)                                               | -                                                            | 210 cat and dog foods: 123 with an avian protein ingredient on the label and 87 without such ingredient on the label (brands not specified)                            |
| Pegels      | 2015 | [19]  | Spain          | PCR          | 99            | barley, oats, rye, wheat                                                 | 30/72 (42%)                                                 | barley > oats > wheat > rye                              | 1/27 (4%)                                                | oats                                                         | 99 cat and dog foods: 27 with a barley, oats, rye or wheat protein ingredient on the label and 72 without such protein ingredients on the label (brands not specified) |
| Willis-Mann | 2014 | [18]  | USA            | ELISA        | 11            | soy                                                                      | 5 (45%)                                                     | soy                                                      | 0 (0%)                                                   | -                                                            | 11 dog foods: 4 labeled as "no soy" and 7 used for elimination diets; 3 of the latter contained hydrolyzed proteins (brands mentioned)                                 |
| Maine       | 2015 | [21]  | United Kingdom | PCR          | 17            | beef, chicken, horse, pork                                               | 14 (82%)                                                    | chicken > pork                                           | 1 (6%)                                                   | chicken                                                      | 17 cat and dog wet foods (brands mentioned)                                                                                                                            |
| Pegels      | 2015 | [20]  | Spain          | PCR          | 90            | horse                                                                    | 12/57 (21%)                                                 | horse                                                    | 0/33 (0%)                                                | -                                                            | 90 cat and dog foods: 33 with an horse protein ingredient on the label and 57 without such ingredient on the label (brands not specified)                              |
| Okuma       | 2015 | [2]   | USA            | PCR          | 52            | beef, chicken, goat, goose, horse, lamb, pork, turkey                    | 16 (31%)                                                    | pork > turkey > chicken, beef > lamb                     | 7 (13%)                                                  | beef > turkey > lamb, pork                                   | 52 cat and dog foods (34) and treats (18) (brands not specified)                                                                                                       |
| Hsieh       | 2016 | [22]  | Taiwan         | ELISA PCR    | 11            | beef, chicken, goat, lamb, pork                                          | 9 (82%)                                                     | pork > lamb > chicken                                    | 0 (0%)                                                   | -                                                            | 11 dog foods, canned (brands not specified)                                                                                                                            |
| Kanakubo    | 2017 | [3]   | USA            | PCR          | 14            | beef, cat, dog, goat, horse, lamb, mouse, pork, rabbit, rat, venison     | 7 (50%)                                                     | beef > lamb > pork                                       | NT                                                       | NT                                                           | 14 cat and dog foods marketed as vegetarian or vegan (brands not specified)                                                                                            |
| Horvath     | 2017 | [9]   | Austria        | PCR          | 12            | beef, chicken, lamb, pork, turkey                                        | 9 (75%)                                                     | beef > lamb, pork                                        | 0 (0%)                                                   | -                                                            | 12 dog foods used for elimination diets including 2 containing hydrolyzed proteins (brands mentioned)                                                                  |
| Lesponne    | 2017 | [7]   | France         | total DNA MS | 1             | ∞                                                                        | 0 (0%)                                                      | -                                                        | 0 (0%)                                                   | -                                                            | 1 hydrolyzed dog food used for elimination diet (brand mentioned)                                                                                                      |
| Roitel      | 2017 | [10]  | France         | IB MS        | 3             | ∞                                                                        | 1 (33%)                                                     | rice                                                     | 0 (0%)                                                   | -                                                            | 3 hydrolyzed dog foods used for elimination diets (brands mentioned)                                                                                                   |

**Abbreviations:** ELISA: enzyme-linked immunosorbent assay; IB: immunoblotting; MBFI: microscopic bone fragment identification; MS: mass spectrometry; NT: not tested; PCR: polymerase chain reaction  
∞: potential and theoretical detection of an infinite number of proteins \* : a ">" denotes the order of frequency of detection, a comma implies an equivalent rate of detection
